# Supplementary material for: Probing the Residual Structure in Avian Prion Hexarepeats by CD, NMR and MD Techniques
Source: Molecules. 2013 Sep 16;18(9):11467–84. doi: 10.3390/molecules180911467 (PMC6270093; doi:10.3390/molecules180911467)
Supplement: Supplementary file 1 [file molecules-18-11467-s001.pdf]

## Supplementary Materials

**Table S1.** Unambiguous inter-residues and intra-residues NOEs used as structural restraints for the ensemble calculation of 2-HexaPY peptide in H<sub>2</sub>O/D<sub>2</sub>O (90:10). NOEs were treated as described in the Experimental section.

| PRO 1  | HA  | HIS 2  | H   |
|--------|-----|--------|-----|
| HIS 2  | HA  | ASN 3  | H   |
| ASN 3  | HA  | PRO 4  | HD2 |
| ASN 3  | HA  | PRO 4  | HD3 |
| ASN 3  | HB2 | PRO 4  | HD3 |
| PRO 4  | HA  | GLY 5  | H   |
| GLY 5  | H   | TYR 6  | H   |
| TYR 6  | HA  | PRO 7  | HD2 |
| TYR 6  | HA  | PRO 7  | HD3 |
| PRO 7  | HA  | HIS 8  | H   |
| HIS 8  | HA  | ASN 9  | H   |
| HIS 8  | HB2 | ASN 9  | H   |
| HIS 8  | HB3 | ASN 9  | H   |
| ASN 9  | HA  | PRO 10 | HD2 |
| ASN 9  | HA  | PRO 10 | HD3 |
| ASN 9  | HB2 | PRO 10 | HD2 |
| ASN 9  | HB3 | PRO 10 | HD2 |
| PRO 10 | HA  | GLY 11 | H   |
| GLY 11 | H   | TYR 12 | H   |
| PRO 1  | HB2 | PRO 1  | HA  |
| PRO 1  | HB3 | PRO 1  | HA  |
| HIS 2  | HA  | HIS 2  | HB2 |
| HIS 2  | HD2 | HIS 2  | HE1 |
| HIS 2  | H   | HIS 2  | HA  |
| HIS 2  | H   | HIS 2  | HB2 |
| HIS 2  | H   | HIS 2  | HB3 |
| ASN 3  | HA  | ASN 3  | HB2 |
| ASN 3  | HA  | ASN 3  | HB3 |
| ASN 3  | H   | ASN 3  | HA  |
| ASN 3  | H   | ASN 3  | HB2 |
| ASN 3  | H   | ASN 3  | HB3 |
| PRO 4  | HB2 | PRO 4  | HD2 |
| PRO 4  | HB2 | PRO 4  | HD3 |
| PRO 4  | HB3 | PRO 4  | HA  |
| PRO 4  | HB3 | PRO 4  | HB2 |
| PRO 4  | HB3 | PRO 4  | HD2 |
| PRO 4  | HB3 | PRO 4  | HD3 |
| PRO 4  | HD2 | PRO 4  | HA  |
| PRO 4  | HD3 | PRO 4  | HD2 |
| TYR 6  | H   | TYR 6  | HA  |
| TYR 6  | H   | TYR 6  | HB2 |
| TYR 6  | H   | TYR 6  | HB3 |

**Table S1.** *Cont.*

| <b>PRO 1</b> | <b>HA</b> | <b>HIS 2</b> | <b>H</b> |
|--------------|-----------|--------------|----------|
| PRO 7        | HB3       | PRO 7        | HA       |
| PRO 7        | HB2       | PRO 7        | HA       |
| PRO 7        | HB3       | PRO 7        | HD3      |
| PRO 7        | HD2       | PRO 7        | HD3      |
| HIS 8        | HA        | HIS 8        | HB2      |
| HIS 8        | HA        | HIS 8        | HD2      |
| HIS 8        | HB2       | HIS 8        | HD2      |
| HIS 8        | HB3       | HIS 8        | HB2      |
| HIS 8        | HB3       | HIS 8        | HD2      |
| HIS 8        | HD2       | HIS 8        | HE1      |
| HIS 8        | H         | HIS 8        | HA       |
| HIS 8        | H         | HIS 8        | HB2      |
| HIS 8        | H         | HIS 8        | HB3      |
| HIS 8        | H         | HIS 8        | HD2      |
| ASN 9        | HA        | ASN 9        | HB2      |
| ASN 9        | HA        | ASN 9        | HB3      |
| ASN 9        | H         | ASN 9        | HA       |
| ASN 9        | H         | ASN 9        | HB2      |
| ASN 9        | H         | ASN 9        | HB3      |
| PRO 10       | HB2       | PRO 10       | HA       |
| PRO 10       | HB2       | PRO 10       | HD3      |
| PRO 10       | HB3       | PRO 10       | HA       |
| PRO 10       | HB3       | PRO 10       | HD2      |
| PRO 10       | HB3       | PRO 10       | HD3      |
| PRO 10       | HD2       | PRO 10       | HB2      |
| GLY 11       | H         | GLY 11       | HA1      |
| GLY 11       | H         | GLY 11       | HA2      |
| TYR 12       | HA        | TYR 12       | HB3      |
